# Supplementary material for: Characterization of Light-Enhanced Respiration in Cyanobacteria
Source: MDPI journal article supplement (doi:10.3390/ijms22010342), 2020-12-31
Supplement: s1 [file s1]

# Characterization of light-enhanced respiration in cyanobacteria

Ginga Shimakawa, Ayaka Kohara, and Chikahiro Miyake

**Supplemental Table S1.** Primers used in this study

| Name              | Sequences (5'-3')                        |
|-------------------|------------------------------------------|
| <i>slr0813</i> p1 | CTATCTCAAATTCAGCACCGATCAC                |
| <i>slr0813</i> p2 | TTAAAATTGTCCAGACGTAAACGGG                |
| <i>slr0813</i> p3 | TTCCTGTCTTTTTGATGTCGGAAAG                |
| <i>slr0813</i> p4 | TTAATTCGCTGGCCAAAGATAAAGC                |
| <i>slr0237</i> p1 | ATGGGGTTAATTTCTGCTTGTTT                  |
| <i>slr0237</i> p2 | CATTTCCGATACCCAGTAGCGCAG                 |
| <i>slr0237</i> p3 | CAACATCATCTGGGCGATCGAATC                 |
| <i>slr0237</i> p4 | TTCCCAATAGGCATTAAAGATCA                  |
| <i>slr1857</i> p1 | GGGGGAGTTAATTTTTCCATTTA                  |
| <i>slr1857</i> p2 | GTAATACAAACGGGAGTGAGCATGTAATAGGTTTTGTTAT |
| <i>slr1857</i> p3 | TTTTTCGTGTGCCTAGATACGGTGCGAAAATTTATTAAAG |
| <i>slr1857</i> p4 | AGTAGGGATGATTGGGAAGAGAG                  |
| <i>Emr</i> p1     | TCCCGTTTGTATTACTTGATCCTT                 |
| <i>Emr</i> p2     | TAGGCACACGAAAAACAAGTTAAG                 |
